# Supplementary material
Source: Springer Nature journal article supplement (https://www.springermedizin.de/resource/supplementary/12943_2012_1057_MOESM4_ESM.pdf/9552182)

# PFS

# OS

TRAP1

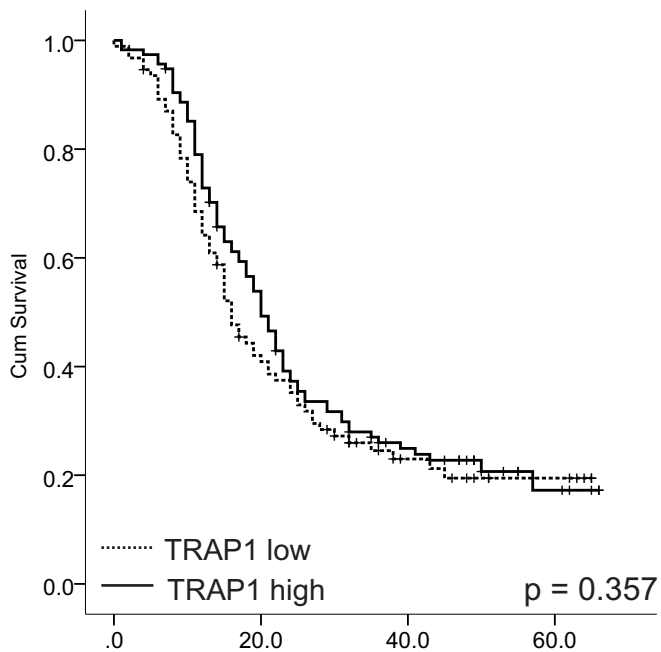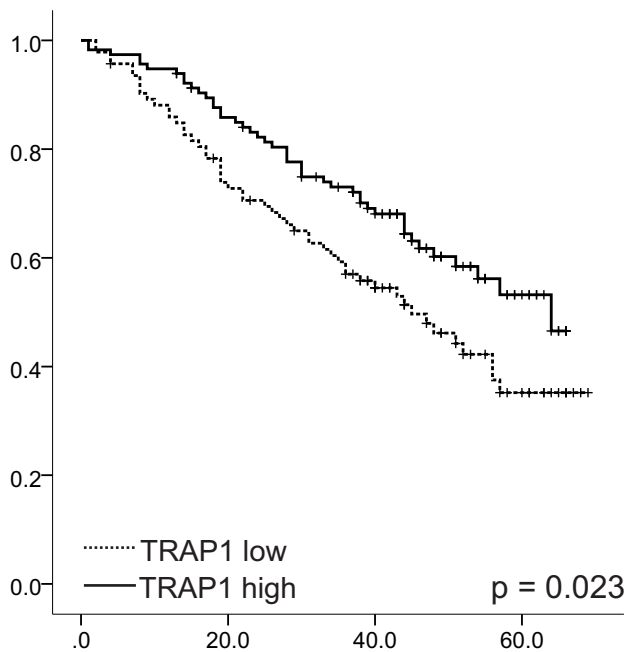

ER $\alpha$

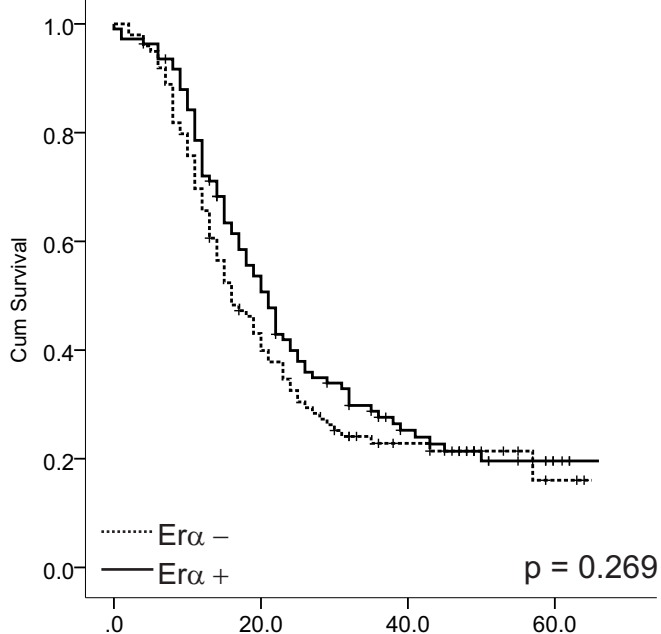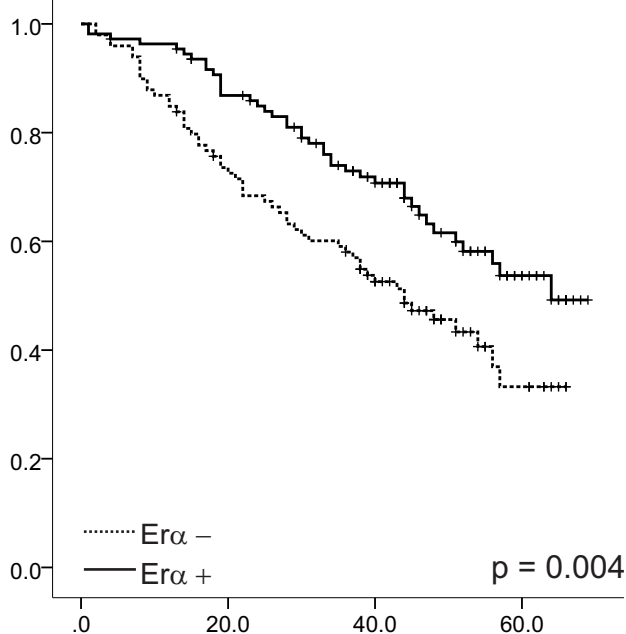

TRAP1 / ER $\alpha$

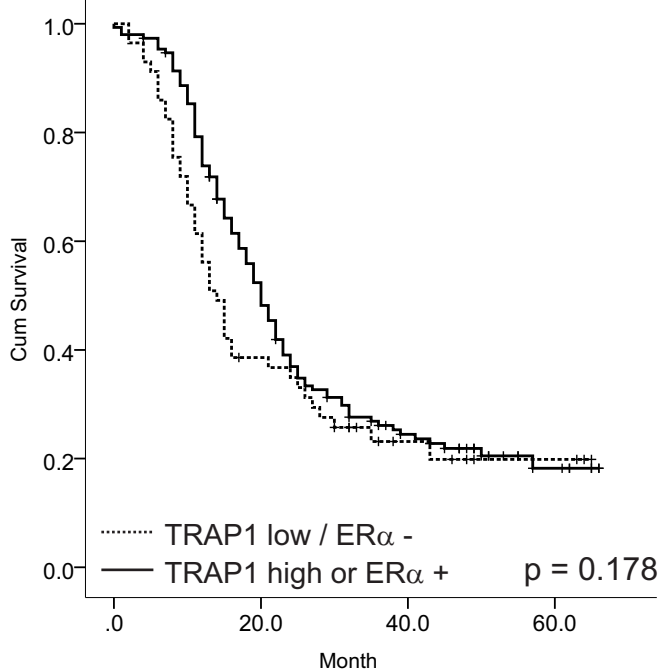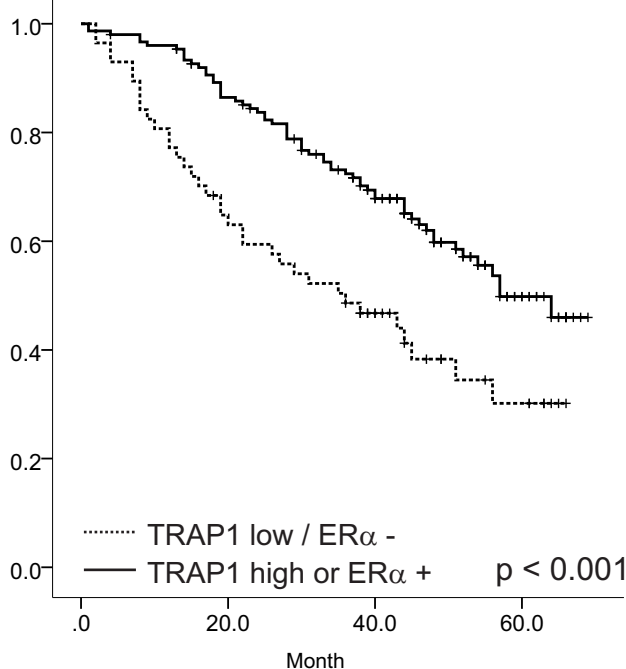

Supplement: MOESM4 [file 9552182]
